# Supplementary material for: Exploring the Relationship between Trichome and Terpene Chemistry in Chrysanthemum
Source: MDPI journal article supplement (doi:10.3390/plants11111410), 2022-05-26
Supplement: s1 [file s1]

**Table S1:** Contents and emission rates of volatile terpenes compounds in flowerheads and leaves of 3 chrysanthemums cultivars

| Compounds                                             | Retention | CJ          |            |               |          | GJB          |              |            |          | HBJ        |           |            |          |
|-------------------------------------------------------|-----------|-------------|------------|---------------|----------|--------------|--------------|------------|----------|------------|-----------|------------|----------|
|                                                       | Index     | Flower(C)   | Leaf (C)   | Flower (E)    | Leaf (E) | Flower (C)   | Leaf (C)     | Flower (E) | Leaf (E) | Flower (C) | Leaf (C)  | Flower (E) | Leaf (E) |
| Monoterpene hydrocarbons                              |           |             |            |               |          |              |              |            |          |            |           |            |          |
| Tricyclene                                            | 934       | ND          | ND         | 7.93<br>±0.44 | ND       | ND           | ND           | ND         | ND       | ND         | ND        | ND         | ND       |
| 3-Carene                                              | 941       | ND          | ND         | ND            | ND       | ND           | 83.19±0.71   | 49.13±4.18 | ND       | ND         | ND        | ND         | ND       |
| Bicyclo[3.1.1]hept-2-ene, 3,6,6-trimethyl-            | 942       | ND          | ND         | 54.51±4.45    | ND       | ND           | ND           | ND         | ND       | ND         | ND        | 18.16±2.12 | ND       |
| β-Thujene                                             | 942       | ND          | ND         | ND            | ND       | 68.03±3.50   | ND           | ND         | ND       | 91.35±2.26 | ND        | ND         | ND       |
| Cyclohexene, 4-methylene-1-(1-methylethyl)-           | 945       | ND          | ND         | ND            | ND       | ND           | ND           | ND         | ND       | ND         | ND        | ND         | ND       |
| Camphene                                              | 954       | ND          | 23.53±3.01 | 116.57±6.05   | ND       | ND           | ND           | 12.02±1.82 | ND       | ND         | ND        | 7.63±1.18  | ND       |
| β-Pinene                                              | 959       | ND          | ND         | ND            | ND       | ND           | ND           | ND         | ND       | ND         | ND        | ND         | ND       |
| Sabinene                                              | 978       | ND          | ND         | ND            | ND       | ND           | ND           | 61.82±5.06 | ND       | ND         | ND        | 29.16±0.60 | ND       |
| β-Phellandrene                                        | 1032      | ND          | ND         | ND            | ND       | ND           | 158.03±17.28 | ND         | ND       | ND         | ND        | ND         | ND       |
| Oxygenated monoterpenes                               |           |             |            |               |          |              |              |            |          |            |           |            |          |
| γ-Terpinene                                           | 1061      | ND          | ND         | ND            | ND       | ND           | ND           | ND         | ND       | ND         | ND        | ND         | ND       |
| 1,3-Cyclohexadiene-1-carboxaldehyde, 2,6,6-trimethyl- | 1025      | ND          | ND         | ND            | ND       | ND           | ND           | ND         | ND       | 43.74±1.62 | ND        | 13.03±1.11 | ND       |
| 4-Thujanol                                            | 1031      | ND          | ND         | ND            | ND       | ND           | ND           | ND         | ND       | ND         | ND        | ND         | ND       |
| Eucalyptol                                            | 1033      | 173.49±5.28 | 78.98±1.32 | 113.61±3.69   | ND       | 296.27±13.75 | 48.68±5.30   | 31.44±1.53 | ND       | 126.85±6.5 | 21.83±2.1 | 30.45±1.12 | ND       |
|                                                       |           |             |            |               |          |              |              |            | 7        |            | 1         |            | ND       |

[illegible]

[illegible]

|                                                                                                |      |             |            |    |    |    |            |    |    |            |    |    |    |
|------------------------------------------------------------------------------------------------|------|-------------|------------|----|----|----|------------|----|----|------------|----|----|----|
| Longifolenaldehyde                                                                             | 1729 | ND          | 46.93±3.82 | ND | ND | ND | ND         | ND | ND | ND         | ND | ND | ND |
| β-Oplopenone                                                                                   | 1742 | ND          | ND         | ND | ND | ND | ND         | ND | ND | ND         | ND | ND | ND |
| Kessane                                                                                        | 1748 | ND          | ND         | ND | ND | ND | ND         | ND | ND | ND         | ND | ND | ND |
| 2-((2R,4aR)-4a,8-Dimethyl-<br>1,2,3,4,4a,5,6,7-<br>octahydronaphthalen-2-yl)prop-2-en-<br>1-ol | 1766 | ND          | ND         | ND | ND | ND | ND         | ND | ND | ND         | ND | ND | ND |
| Acorenone B                                                                                    | 1791 | ND          | ND         | ND | ND | ND | ND         | ND | ND | 95.04±6.58 | ND | ND | ND |
| 15-Copaenol                                                                                    | 1814 | 159.62±4.39 | ND         | ND | ND | ND | ND         | ND | ND | ND         | ND | ND | ND |
| cis-Z-α-Bisabolene epoxide                                                                     | 1850 | ND          | ND         | ND | ND | ND | 31.58±2.73 | ND | ND | ND         | ND | ND | ND |



|                                    |      |              |              |            |    |              |              |            |    |            |              |             |    |
|------------------------------------|------|--------------|--------------|------------|----|--------------|--------------|------------|----|------------|--------------|-------------|----|
| Eucalyptol                         | 1033 | 181.44±4.46  | 487.09±13.40 | 29.57±2.62 | ND | 255.69±18.58 | ND           | ND         | ND | ND         | 305.88±44.41 | 57.66±1.09  | ND |
| 2,6,6-Trimethylbicyclo[3.2.0]      |      |              |              |            |    |              |              |            |    | 1318.51±30 |              |             |    |
| hept-2-en-7-one                    | 1064 | ND           | 21.50±0.89   | ND         | ND | ND           | ND           | ND         | ND | .55        | ND           | ND          | ND |
| Thujone                            | 1066 | 127.50±11.08 | ND           | ND         | ND | ND           | ND           | ND         | ND | ND         | ND           | ND          | ND |
| Sabinene hydrate                   | 1069 | ND           | ND           | ND         | ND | ND           | ND           | ND         | ND | ND         | 84.08±5.57   | ND          | ND |
| Isocyclocitral                     | 1096 | ND           | ND           | ND         | ND | 43.33±1.73   | ND           | ND         | ND | ND         | ND           | ND          | ND |
| Camphor                            | 1103 | ND           | ND           | ND         | ND | ND           | ND           | ND         | ND | ND         | ND           | 158.31±11.4 | ND |
| 2-Bornanone                        | 1147 | 139.76±6.64  | ND           | 7.31±0.30  | ND | ND           | ND           | ND         | ND | ND         | 882.34±15.29 | ND          | ND |
| trans-Verbenol                     | 1148 | 113.18±5.92  | 378.36±4.41  | ND         | ND | 230.79±9.72  | 68.72±4.74   | ND         | ND | ND         | ND           | ND          | ND |
| cis-Chrysanthenol                  | 1166 | 566.52±21.53 | 958.8±43.51  | ND         | ND | 945.32±32.82 | 182.28±13.29 | 31.64±2.34 | ND | ND         | ND           | ND          | ND |
| endo-Borneol                       | 1168 | ND           | ND           | 2.29±0.3   | ND | ND           | ND           | ND         | ND | ND         | 145.02±2.96  | ND          | ND |
| 2-Cyclohexen-1-one                 |      |              |              |            |    |              |              |            |    |            |              |             |    |
| ,3-methyl-6-(1-methylethyl)-       | 1229 | ND           | ND           | ND         | ND | ND           | ND           | ND         | ND | ND         | ND           | ND          | ND |
| Sesquiterpene hydrocarbons         |      |              |              |            |    |              |              |            |    |            |              |             |    |
| γ-Elemene                          | 1330 | ND           | ND           | ND         | ND | ND           | ND           | ND         | ND | ND         | ND           | ND          | ND |
| Bicyclo[5.2.0]nonane, 2-methylene- |      |              |              |            |    |              |              |            |    |            |              |             |    |
| 4,8,8-trimethyl-4-vinyl-           | 1363 | 54.33±1.67   | ND           | ND         | ND | 101.18±3.88  | ND           | ND         | ND | 53.27±6.50 | ND           | ND          | ND |
| β-Elemene                          | 1391 | 99.71±3.12   | 327.52±4.81  | ND         | ND | 177.92±5.62  | 356.06±29.09 | ND         | ND | 52.79±1.10 | ND           | ND          | ND |
| β-Caryophyllene                    | 1422 | ND           | 395.04±11.38 | ND         | ND | ND           | 351.97±9.64  | 3.05±0.1   | ND | 65.02±1.09 | ND           | ND          | ND |
| β-Copaene                          | 1431 | ND           | 57.36±3.29   | ND         | ND | ND           | 82.13±7.85   | ND         | ND | ND         | ND           | ND          | ND |

|                                             |      |             |              |    |    |             |              |    |    |            |              |    |    |
|---------------------------------------------|------|-------------|--------------|----|----|-------------|--------------|----|----|------------|--------------|----|----|
| Chrysantenyl 2-methuylbutanoate             | 1433 | 189.78±5.67 | ND           | ND | ND | ND          | ND           | ND | ND | ND         | ND           | ND | ND |
| β-Selinene                                  | 1433 | ND          | ND           | ND | ND | ND          | ND           | ND | ND | 27.89±0.89 | ND           | ND | ND |
| α-Cedrene                                   | 1443 | ND          | ND           | ND | ND | ND          | ND           | ND | ND | ND         | ND           | ND | ND |
| cis-α-Bergamotene                           | 1445 | ND          | ND           | ND | ND | 38.46±1.64  | 51.31±13.77  | ND | ND | 36.97±1.85 | ND           | ND | ND |
| γ-Muurolene                                 | 1458 | ND          | ND           | ND | ND | ND          | 66.55±5.06   | ND | ND | ND         | ND           | ND | ND |
| Curcumene                                   | 1482 | ND          | ND           | ND | ND | ND          | ND           | ND | ND | ND         | ND           | ND | ND |
| cis-β-Copaene                               | 1486 | ND          | 157.89±7.2   | ND | ND | ND          | 233.70±24.47 | ND | ND | ND         | ND           | ND | ND |
| cis-β-Farnesene                             | 1489 | ND          | ND           | ND | ND | 171.76±4.85 | ND           | ND | ND | ND         | 439.45±5.89  | ND | ND |
| α-Zingiberene                               | 1499 | ND          | ND           | ND | ND | ND          | ND           | ND | ND | ND         | ND           | ND | ND |
| Germacrene D                                | 1505 | ND          | ND           | ND | ND | ND          | 33.32±2.64   | ND | ND | ND         | ND           | ND | ND |
| α-Farnesene                                 | 1511 | ND          | ND           | ND | ND | ND          | 101.75±9.23  | ND | ND | ND         | ND           | ND | ND |
| β-Sesquiphellandrene                        | 1529 | ND          | ND           | ND | ND | ND          | ND           | ND | ND | ND         | ND           | ND | ND |
| (E)-γ-Bisabolene                            | 1601 | ND          | ND           | ND | ND | 79.89±3.69  | 123.54±15.76 | ND | ND | ND         | ND           | ND | ND |
| <b>Oxygenated sesquiterpenes</b>            |      |             |              |    |    |             |              |    |    |            |              |    |    |
| Cubebol                                     | 1464 | ND          | 77.75±4.11   | ND | ND | ND          | ND           | ND | ND | ND         | ND           | ND | ND |
| Caryophyllene oxide                         | 1588 | ND          | 96.86±7.86   | ND | ND | ND          | ND           | ND | ND | ND         | 141.83±8.93  | ND | ND |
| Neointermedeol                              | 1659 | ND          | 98.47±5.01   | ND | ND | ND          | ND           | ND | ND | ND         | 97.61±1.75   | ND | ND |
| Selin-6-en-4.alpha.-ol                      | 1663 | ND          | ND           | ND | ND | ND          | ND           | ND | ND | ND         | 79±3.83      | ND | ND |
| 4(15),5,10(14)-Germacatrien-1-ol            | 1670 | ND          | 134.98±15.08 | ND | ND | ND          | ND           | ND | ND | ND         | 238.55±13.41 | ND | ND |
| Longifolenaldehyde                          | 1729 | ND          | ND           | ND | ND | ND          | ND           | ND | ND | ND         | ND           | ND | ND |
| β-Oplopenone                                | 1742 | ND          | ND           | ND | ND | ND          | ND           | ND | ND | ND         | 73.95±5.47   | ND | ND |
| Kessane                                     | 1748 | ND          | 107.92±11.92 | ND | ND | ND          | ND           | ND | ND | ND         | 81.01±3.80   | ND | ND |
| 2-((2R,4aR)-4a,8-Dimethyl-1,2,3,4,4a,5,6,7- | 1766 | ND          | ND           | ND | ND | ND          | 104.07±1.56  | ND | ND | ND         | ND           | ND | ND |

|                                         |      |    |    |    |    |    |    |    |    |            |              |    |    |
|-----------------------------------------|------|----|----|----|----|----|----|----|----|------------|--------------|----|----|
| octahydronaphthalen-2-yl)prop-2-en-1-ol |      |    |    |    |    |    |    |    |    |            |              |    |    |
| Acorenone B                             | 1791 | ND         | ND           | ND | ND |
| 15-Copaenol                             | 1814 | ND | 47.27±2.49 | 338.41±19.04 | ND | ND |
| cis-Z- $\alpha$ -Bisabolene epoxide     | 1850 | ND         | ND           | ND | ND |

**Note:** ND represents not detected; Flower (C) and Leaf (C) represent accumulated concentration of terpenoid components in flower and leaf; Flower (E) and Leaf (E) represent emission rate of terpenoid compounds in flower and leaf; Mean ±SE, the Mean values were calculated with three biological repetition ( relative values >1% of total amount).
